# Supplementary material for: Dysosmobacter welbionis is a newly isolated human commensal bacterium preventing diet-induced obesity and metabolic disorders in mice
Source: HighWire-hosted journal article supplement (doi:10.1136/gutjnl-2020-323778), 2021-06-08
Supplement: gutjnl-2020-323778supp005_data_supplement.pdf [file gutjnl-2020-323778supp005_data_supplement.pdf]

**Supplementary Table S3. Primers sequences for relative genes expression analysis by qPCR.**

| Primers                              |         | Sequence                   |
|--------------------------------------|---------|----------------------------|
| <b><i>Rpl-19</i></b>                 | Forward | GAAGGTCAAAGGGAATGTGTTCA    |
|                                      | Reverse | CCTGTTGCTCACTTGT           |
| <b><i>Cd36</i></b>                   | Forward | ATCTCAATGTCCGAGACTTTTCAAC  |
|                                      | Reverse | CTCGTTGATTTCTGGGGAAC       |
| <b><i>Fatp4</i></b>                  | Forward | GGCTCTCATCAACACCAACC       |
|                                      | Reverse | CCAGGATCCAGAGCAGAAGA       |
| <b><i>Lpl</i></b>                    | Forward | TCTGTACGGCACAGTGG          |
|                                      | Reverse | CCTCTCGATGACGAAGC          |
| <b><i>Atgl</i></b>                   | Forward | ACAGCTCCAACATCCAC          |
|                                      | Reverse | AGCCCTGTTTGCACATCTCT       |
| <b><i>Hsl</i></b>                    | Forward | GCTAGCCAGGCTCATCTCCT       |
|                                      | Reverse | GTTCTTGAGGTAGGGCTCGT       |
| <b><i>Plin1</i></b>                  | Forward | GATGCCCTGAAGGGTGTAC        |
|                                      | Reverse | CCTCTGCTGAAGGGTTATCG       |
| <b><i>Scd1</i></b>                   | Forward | CCTCTTCGGGATTTTCTACTACATG  |
|                                      | Reverse | GCCGTGCCTTGTAAGTTCTGT      |
| <b><i>Tnfa</i></b>                   | Forward | TCGAGTGACAAGCCTGTAGCC      |
|                                      | Reverse | TTGAGATCCATGCCGTTGG        |
| <b><i>Il-1<math>\beta</math></i></b> | Forward | TCGCTCAGGGTCACAAGAAA       |
|                                      | Reverse | CCTCTCGATGACGAAGC          |
| <b><i>Mcp1</i></b>                   | Forward | GCAGTTAACGCCCACTCA         |
|                                      | Reverse | TCCAGCCTACTCATTGGGATCA     |
| <b><i>F4/80</i></b>                  | Forward | TGACAACCAGACGGCTTGTG       |
|                                      | Reverse | GCAGGCGAGGAAAAGATAGTGT     |
| <b><i>Cd68</i></b>                   | Forward | CTTCCCACAGGCAGCACAG        |
|                                      | Reverse | AATGATGAGAGGCAGCAAGAGG     |
| <b><i>Cd163</i></b>                  | Forward | TCCACACGTCCAGAACAGTC       |
|                                      | Reverse | CCTTGAAACAGAGACAGGC        |
| <b><i>Cd11c</i></b>                  | Forward | ACGTCAGTACAAGGAGATGTTGGA   |
|                                      | Reverse | ATCCTATTGCAGAATGCTTCTTTACC |
| <b><i>Cd11b</i></b>                  | Forward | GTCAGAGTCTGCCTCCGTGT       |

|               |         |                         |
|---------------|---------|-------------------------|
|               | Reverse | CCTGCGTGTGTTGTTCTTTG    |
| <b>Lbp</b>    | Forward | GTCCTGGGAATCTGTCCTTG    |
|               | Reverse | CCGGTAACCTTGCTGTTGTT    |
| <b>Col1a1</b> | Forward | CCTCAGGGTATTGCTGGACAAC  |
|               | Reverse | ACCACTTGATCCAGAAGGACCTT |
| <b>Col6a3</b> | Forward | TCAAGAGCCTGCAGTGGATG    |
|               | Reverse | TGGACACTTCTTGTCTATGCAG  |
| <b>Mmp13</b>  | Forward | GTTTACCTTCGCCTCACTAG    |
|               | Reverse | TCTCTCCTTCCCAGGGCAAGCAT |
| <b>Ucp1</b>   | Forward | GCTACACGGGGACCTACAATG   |
|               | Reverse | CGTCATCTGCCAGTATTTTGT   |
| <b>Dio2</b>   | Forward | AATTATGCCTCGGAGAAGACCG  |
|               | Reverse | GGCAGTTGCCTAGTGAAAGGT   |
| <b>Pgc1-α</b> | Forward | AGCCGTGACCACTGACAACGAG  |
|               | Reverse | GCTGCATGGTTCTGAGTGCTAAG |
| <b>Prdm16</b> | Forward | CAGCACGGTGAAGCCATTC     |
|               | Reverse | GCGTGCATCCGCTTGTG       |
| <b>Ppar-α</b> | Forward | TGACAACCAGACGGCTTGTG    |
|               | Reverse | GCAGGCGAGGAAAAGATAGTGT  |
| <b>Mt-Co1</b> | Forward | CAACGGCGTCTGAAGACAAA    |
|               | Reverse | TGACGGTCTCCACGGACAT     |
| <b>Cox7a1</b> | Forward | CCGACAATGACCTCCCAGTA    |
|               | Reverse | TGTTTGTCCAAGTCCTCCAA    |
| <b>Cox8b</b>  | Forward | GGACATTCAGGGTGCCTCTT    |
|               | Reverse | GAAGTGGGAGTTTTGGCTGG    |
